# Supplementary material for: Non‐Obese MKR Mouse Model of Type 2 Diabetes Reveals Skeletal Alterations in Mineralization and Material Properties
Source: PubMed Central journal article supplement (PMC8861985; doi:10.1002/jbm4.10583), 2021-12-16
Supplement: JBM4-6-e10583-s002.pdf [file JBM4-6-e10583-s002.pdf]

## Supporting Information #2

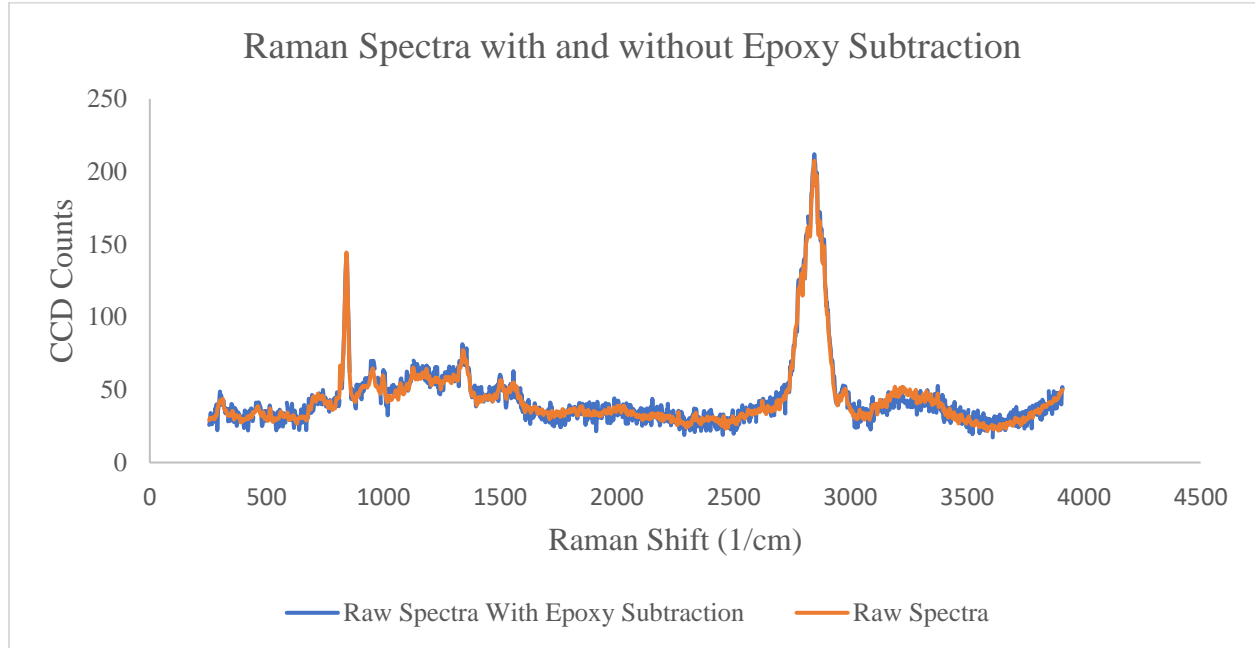

### Figure Legend

**Supplemental Figure 2.** Upon performing a background subtraction of a pure epoxy spectra using confocal Raman spectroscopy and comparing it to the representative bone used for the scan. The percent difference between the two spectra was 8.77% with no significant difference in the FWHH of the of the peaks of interest.
